# Supplementary material for: How Protein Stability and New Functions Trade Off
Source: PLoS Comput Biol. 2008 Feb 29;4(2):e1000002. doi: 10.1371/journal.pcbi.1000002 (PMC2265470; doi:10.1371/journal.pcbi.1000002)
Supplement: Table S1 — Summary of enzymes. (0.04 MB XLS) [file pcbi.1000002.s002.xls]

## Sheet: Sheet1
	Table S1. Summary of enzymes
	Name		Chain lengtha	PDB no.	Native activity (E.C. no.)	"New" function (E.C. no.)	number of mutations
	Comon name	Abbreviation					new-function	other
	Aspartate aminotransfrase	AspATs	413 (408)	1ARS	Aspartate aminotransferase (2.6.1.1)	Valine aminotransferase (2.6.1)	24	85
	Burkholderia gladioli esterase EstB	EstB	392 (377)	1CI8	Carboxylesterase (3.1.1.1)	Enatioselective	9	2
	Cytocrome c peroxidase	CCP	296 (292)	1ZBY	Cytochrome peroxidase (1.11.1.5)	Peroxidase (1.11.1.7)	6	25
	Dienelactone hydrolase	DLH	236 (233)	1DIN	Carboxymethylenebutenolidase (3.1.1.45)	Naphthyl acetate deacetylase (3.1.1.56)	5	6
	E. Coli dihydrofolate reductase	DHFR	159	1RA9	Dihydrofolate reductase (1.5.1.3)	decrease biding to inihibitor (trimethoprim)	14	8
	E. Coli Glucosamine synthase	GlmS	608	2BPL	Glucosamine synthase (2.6.1.16)	decrease biding to inihibitor (glucosamine-6-phosphate)	3	7
	Escherichia coli KDPG aldolase	KDPG aldolase	213	1FQ0	Lyase (4.1.2.14)	2-keto-4-hydroxyoctonate	9	0
	Extradiol dioxygenase	DoxG	299	DoxGb	Catechol 2,3-dioxygenase (1.13.11.2)	3,4-dihydroxybiphenyls	11	10
	Human carbonic anhydrase	CAII	260 (259)	1LUG	Carbonic anhydorase (4.2.1.1)	Naphthyl acetate deacetylase (3.1.1.56)	2	1
	Human Glutathione transderase	hGST	240 (239)	2C3N	Glutahione transferase (2.5.1.18)	7-amino-4-chloromethyl coumarin	8	39
	Neisseria polysaccharea amylosucrase	Amylosucrase	628	1G5A	Amylosucrase (2.4.1.4)	Sucrose polymeration	6	4
	OmpT protease	OmpT protease	297	1I78	Protease (3.4.23.49)	Ala-Arg cleavage	2	2
	OPDA phosphotriesterase	OPDA	329	2D2J	Phosphotriesterase (3.1.8.1)	Methyl parathion	10	0
	P. aeruginosa Lipase	Lipase	285	1EX9	Triacylglycerol hydrolases (3.1.1.3)	Enatioselective	46	9
	P. diminuta phosphotriesterase	PTE	365 (330)	1HZY	Phosphotriesterase (3.1.8.1)	Naphthyl acetate deacetylase (3.1.1.56) Chlorpyrifos(3.1.1.2)	8	10
	P450 2A6	P450 2A6	476 (465)	1Z10	Oxidoreductase (1.14.14.1)	Indole	5	0
	PTE homology protein	PHP	292 (291)	1BF6	Unkown	Naphthyl acetate deacetylase (3.1.1.56)	3	2
	Recombinant serum paraoxonase 1	rePON1	355 (339)	1V04	Lactonase (3.1.1)	Naphthyl acetate deacetylase (3.1.1.56) phosphotriesterase (3.1.8.1)	31	48
	S. clavuligerus deacetoxycephalosporin C synthase	DAOCS	311 (279)	1DCS	Deacetoxycephalosporin-C hydroxylase (1.14.11.26)	Penicillin G	17	10
	Tagatose-1,6-bisphosphate aldolase	TBPA	284 (273)	1GVF	Tagatose-bisphosphate aldolase (4.1.2.40)	fructose 1,6-bisphosphate (4.1.2.13)	4	1
	TEM-1 b-lactamase	TEM-1	290 (264)	1BTL	Ampicillin (3.5.2.6)	Cefatoxin (3.5.2.6)	18	30
	Vanillyl-alcohol oxidase	VAO	560 (550)	1VAO	Vanillyl-alcohol oxidase (1.1.3.38)	Cresol (1.17.99.1)	5	3
						Total	246	302
	aThe number in the blacket is the chain length in the PDB file
	bThe 3D structure of DoxG was kindly donated by Lindsay D. Eltis, Pascal Fortin and Jeff Bolin
