# Supplementary material for: How Protein Stability and New Functions Trade Off
Source: PLoS Comput Biol. 2008 Feb 29;4(2):e1000002. doi: 10.1371/journal.pcbi.1000002 (PMC2265470; doi:10.1371/journal.pcbi.1000002)
Supplement: Table S2 — Point mutations included in the study. (0.13 MB XLS) [file pcbi.1000002.s003.xls]

## Sheet: Sheet1
Table S2. Point mutations included in the study.
a DDG values predicted by FoldX
New-function mutations
protein	mutation	DDG	ASA	DSSP	reference		protein	mutation	DDG	ASA	DSSP	reference
Amylosucrase	E227G	2.15	0.3	loop	[1]		DHFR	A26T	-0.31	0.21	helix	[2]
Amylosucrase	F598S	-0.88	0.66	loop	[1]		DHFR	H45R	-1.3	0.71	helix	[2]
Amylosucrase	N387D	-1.3	0	sheet	[1]		DHFR	I94L	0.46	0.08	loop	[2]
Amylosucrase	N503I	0.62	0.51	loop	[1]		DHFR	K109R	0.32	0.18	sheet	[2]
Amylosucrase	R20C	2.79	0.23	helix	[1]		DHFR	M20V	1.29	0.2	loop	[2]
Amylosucrase	V389L	-0.22	0	loop	[1]		DHFR	V10A	0.05	0.38	helix	[2]
AspATs	A11T	-0.52	0.84	loop	[3]		DHFR	W30R	-0.98	0.05	helix	[2]
AspATs	A12T	0.32	0.78	loop	[4]		DHFR	F153S	4.64	0.03	sheet	[2]
AspATs	A293V	-0.11	0.84	helix	[4]		DHFR	P21L	2.11	0.58	loop	[2]
AspATs	F24L	0.49	0.16	helix	[5]		DHFR	P21Q	1.28	0.58	loop	[2]
AspATs	G261A	-0.85	0.18	loop	[4]		DHFR	I115V	0.76	0.02	sheet	[2]
AspATs	I37M	0.87	0.19	loop	[3]		DHFR	R158Q	5.08	0.29	sheet	[2]
AspATs	I353T	2.95	0	helix	[5]		DHFR	R158W	5.54	0.29	sheet	[2]
AspATs	K41Y	0.29	0.24	loop	[4]		DHFR	R159G	3.6	0.91	loop	[2]
AspATs	N142T	1	0.43	loop	[3]		DLH		-0.4	0.09	loop	[6]
AspATs	N297S	1.39	0.23	loop	[3]		DLH	C123S	1.8	0	helix	[6]
AspATs	N34D	-0.86	0.14	sheet	[3]		DLH	E36D	-0.21	0.01	loop	[6]
AspATs	N69L	1	0.8	loop	[4]		DLH	R105H	0.37	0.48	helix	[6]
AspATs	P13T	0.82	0.84	loop	[4]		DLH	S208G	0.11	0.38	loop	[6]
AspATs	R129G	4.06	0.43	sheet	[4]		DoxG	I154F	-0.24	0.09	sheet	[7]
AspATs	S139G	2.75	0.16	loop	[3]		DoxG	I154W	0.21	0.09	sheet	[7]
AspATs	S361S	1.3	0	sheet	[5]		DoxG	L190M	0.37	0.19	sheet	[7]
AspATs	S363G	1.91	0.02	sheet	[5]		DoxG	L190Y	1.17	0.19	sheet	[7]
AspATs	S285G	1.54	0.5	helix	[4]		DoxG	L242G	-0.16	0.01	sheet	[7]
AspATs	T109S	0.08	0.3	helix	[4]		DoxG	L242S	3.02	0.01	sheet	[7]
AspATs	T47I	-0.77	0.37	loop	[4]		DoxG	L242T	5.06	0.01	sheet	[7]
AspATs	V387L	1.13	0.02	sheet	[3]		DoxG	L242V	2.63	0.01	sheet	[7]
AspATs	V146I	-0.82	0.06	helix	[4]		DoxG	P267L	-0.52	0.01	sheet	[7]
AspATs	V39L	0	0.27	loop	[4]		DoxG	S191W	-2.88	0.02	sheet	[7]
AspATs	R81H	0.59	0.55	helix	[4]		DoxG	S191Y	0.7	0.02	sheet	[7]
CAII	A65V	-0.08	0.03	loop	[8]		EstB	A373T	0.75	0	sheet	[9]
CAII	T199A	1.08	0.19	loop	[8]		EstB	E316V	0.39	0.62	loop	[9]
CCP	D217G	2.1	1	loop	[10]		EstB	G349C	-0.78	0.15	sheet	[9]
CCP	D224Y	-1.09	0.3	sheet	[10]		EstB	H253L	2.19	0.45	loop	[9]
CCP	D217P	1.94	1	loop	[11]		EstB	I152T	0.99	0.06	loop	[9]
CCP	D224N	-1.09	0.3	sheet	[11]		EstB	L135H	2.18	0.1	helix	[9]
CCP	R48H	2.86	0.3	helix	[11]		EstB	V351A	1.26	0.14	loop	[9]
CCP	T180A	0.78	0.06	loop	[11]		EstB	V351C	1.13	0.14	loop	[9]
New-function mutations
protein	mutation	DDG	ASA	DSSP	reference		protein	mutation	DDG	ASA	DSSP	reference
EstB	V351S	2.2	0.14	loop	[9]		Lipase	E160A	1.09	0.52	helix	[12]
GlmS	G471S	-0.58	0	sheet	[13]		Lipase	I243S	0.95	0.34	loop	[12]
GlmS	L468P	3.73	0.03	sheet	[13]		Lipase	L162G	2.76	0.08	helix	[12]
GlmS	S449P	0.79	0.76	helix	[13]		Lipase	N163F	4.42	0.01	helix	[12]
hGST	I32V	1.16	0.57	sheet	[14]		Lipase	S155F	-1.16	0.63	helix	[12]
hGST	I32M	-0.1	0.57	sheet	[14]		Lipase	S155M	-1.81	0.63	helix	[12]
hGST	I32S	1.46	0.57	sheet	[14]		Lipase	S161P	1.63	0.52	helix	[12]
hGST	I32L	0.4	0.57	sheet	[14]		Lipase	S164G	0.42	0.38	helix	[12]
hGST	H176Q	3.95	0.04	helix	[14]		Lipase	S199G	1.07	0	loop	[12]
hGST	W234R	4.31	0.14	helix	[14]		Lipase	S53P	0.31	0	helix	[12]
hGST	W234T	4.09	0.14	helix	[14]		Lipase	T180C	-0.75	1	loop	[12]
hGST	W234P	1.34	0.14	helix	[14]		Lipase	T180I	0.45	1	loop	[12]
KDPG aldolase	G183R	0.9	0.03	sheet	[15]		Lipase	V272A	1.3	0.03	helix	[12]
KDPG aldolase	G70S	3.43	0	sheet	[15]		Lipase	V55G	1.23	0.36	helix	[12]
KDPG aldolase	K202M	0.11	0.68	helix	[15]		Lipase	F259L	1.17	0.59	loop	[16]
KDPG aldolase	K202N	-0.45	0.68	helix	[15]		Lipase	K110R	-1.52	0.32	loop	[16]
KDPG aldolase	N168S	2.64	0.18	helix	[15]		Lipase	K223Q	0.39	0.65	loop	[16]
KDPG aldolase	P77S	1.01	0.36	helix	[15]		Lipase	L17F	1.69	0.26	loop	[16]
KDPG aldolase	Q89R	-1.72	0.39	loop	[15]		Lipase	L50F	0.89	0	loop	[16]
KDPG aldolase	R170S	1.83	0.48	helix	[15]		Lipase	N21D	2.23	0.35	sheet	[16]
KDPG aldolase	V22L	-0.24	0.29	loop	[15]		Lipase	S158T	0.55	0	helix	[16]
Lipase	A34T	0.11	0.15	helix	[17]		Lipase	S161D	-0.04	0.52	helix	[16]
Lipase	L208H	-0.25	0.62	loop	[17]		Lipase	S284C	0.46	0.72	loop	[16]
Lipase	M16L	0.93	0.27	loop	[17]		Lipase	Y8H	4.75	0.11	loop	[16]
Lipase	P86L	1.66	0.04	helix	[17]		Lipase	A213D	0.73	0.7	helix	[18]
Lipase	Q275L	0.47	0.53	helix	[17]		Lipase	F207S	0.34	0.95	loop	[18]
Lipase	S237T	0.16	0.01	loop	[17]		Lipase	F265L	0.22	0.84	loop	[18]
Lipase	S268C	0.83	0.46	helix	[17]		Lipase	P96H	1.69	0.23	loop	[18]
Lipase	S71G	2.4	0.38	helix	[17]		OmpT protease	D208G	3.68	0.01	sheet	[19]
Lipase	T87S	1.39	0	helix	[17]		OmpT protease	S223R	-5.25	0.11	sheet	[19]
Lipase	V232I	-0.33	0.02	loop	[17]		OPDA	D208G	4.24	0.05	helix	[20]
Lipase	V55A	1.11	0.38	helix	[17]		OPDA	G348C	-0.54	0.27	helix	[20]
Lipase	V94A	1.34	0.39	helix	[17]		OPDA	H254R	-5.6	0.08	loop	[20]
Lipase	S149G	0.44	0.59	loop	[21], [12]		OPDA	I274T	0.26	0.68	loop	[20]
Lipase	S155L	-2.11	0.63	helix	[21], [12]		OPDA	K185R	-1.89	0.27	helix	[20]
Lipase	V47G	3.49	0.03	loop	[21], [12]		OPDA	K285R	-0.86	0.24	helix	[20]
Lipase	N256L	-0.03	0.11	sheet	[21]		OPDA	K294N	-0.52	0.46	loop	[20]
Lipase	T234S	1.24	0.05	loop	[12], [12]		OPDA	N265D	-1.65	0.34	loop	[20]
Lipase	D20N	0.04	0.33	loop	[12]		OPDA	Q211L	-0.4	0.29	helix	[20]
New-function mutations
protein	mutation	DDG	ASA	DSSP	reference		protein	mutation	DDG	ASA	DSSP	reference
OPDA	T352A	-0.56	0.33	helix	[20]		PON	Y293H	1.39	0.42	loop	[22]
P450 2A6	I140M	-0.16	0.12	loop	[23]		PTE	F306C	2.39	0.17	loop	[24]
P450 2A6	I300V	0.88	0.05	helix	[23]		PTE	H254R	-1.96	0.06	loop	[24]
P450 2A6	I366V	0.52	0.17	loop	[23]		PTE	P342A	1.55	0.5	loop	[24]
P450 2A6	L204C	0.2	0.15	helix	[23]		PTE	A203T	-1.23	0.16	loop	[25]
P450 2A6	N297Q	0.07	0.07	helix	[23]		PTE	A80V	-0.16	0.04	helix	[25]
PHP	K23Y	0.08	0.43	loop	[24]		PTE	K185R	-2.26	0.29	helix	[25]
PHP	T210A	6.4	0.01	loop	[24]		PTE	P342S	0.15	0.47	loop	[25]
PHP	T245A	1.22	0.21	loop	[24]		PTE	V116I	0.8	0	helix	[25]
PON	F292L	1.15	0.34	helix	[26]		DAOCS	A106T	0.06	0.43	loop	[27]
PON	F292S	3.02	0.34	helix	[26]		DAOCS	C155Y	2.24	0.06	loop	[27]
PON	F292V	1.68	0.34	helix	[26]		DAOCS	C281R	-0.29	0.26	helix	[27]
PON	I291L	0.17	0.15	helix	[26]		DAOCS	C281Y	1.83	0.26	helix	[27]
PON	K84Q	0.55	0.27	sheet	[26]		DAOCS	D107G	0.65	0.9	loop	[27]
PON	L69V	0.67	0.09	loop	[26]		DAOCS	G300V	0.36	1	loop	[27]
PON	N287D	-0.22	0.05	loop	[26]		DAOCS	G79E	-0.49	0.58	loop	[27]
PON	S138L	2.09	0.31	loop	[26]		DAOCS	H244Q	1.33	0.04	sheet	[27]
PON	S193P	4.35	0.52	helix	[26]		DAOCS	I305L	-0.53	0.44	sheet	[27]
PON	T332A	1.1	0	sheet	[26]		DAOCS	I305M	-0.41	0.44	sheet	[27]
PON	V346A	1.12	0.16	loop	[26]		DAOCS	L277Q	-0.34	0.35	helix	[27]
PON	V346M	-0.45	0.16	loop	[26]		DAOCS	M188I	0.67	0.01	loop	[27]
PON	Y293D	2.55	0.42	loop	[26]		DAOCS	M188V	-0.16	0.01	loop	[27]
PON	A180P	1.58	0	sheet	[22]		DAOCS	M73T	2.12	0.1	loop	[27]
PON	A187I	-0.97	0.37	loop	[22]		DAOCS	N304K	1.41	0.17	loop	[27]
PON	E354G	1.82	0.39	sheet	[22]		DAOCS	V275I	-0.1	0.04	helix	[27]
PON	I291F	-0.27	0.15	helix	[22]		DAOCS	Y184H	1.92	0.28	sheet	[27]
PON	I291T	1.11	0.15	helix	[22]		TBPA	D104G	2.14	0.13	loop	[28]
PON	I291V	0.15	0.15	helix	[22]		TBPA	H26Y	-0.29	0.29	loop	[28]
PON	K192A	1.29	0.16	helix	[22]		TBPA	S106G	0.7	0.06	loop	[28]
PON	K192G	2.64	0.16	helix	[22]		TBPA	V121A	1.47	0.03	helix	[28]
PON	L240M	0.18	0.02	loop	[22]		TEM1	A237T	-0.27	0.38	sheet	[31]
PON	L240T	0.82	0.02	loop	[22]		TEM1	A42G	1.28	0.17	loop	[31]
PON	L355R	0.64	0.56	loop	[22]		TEM1	D179G	2.88	0.02	loop	[31]
PON	N43D	0.69	0.65	sheet	[22]		TEM1	D179N	2.38	0.02	loop	[31]
PON	P286S	3.54	0.04	loop	[22]		TEM1	E104K	-0.76	0.8	loop	[31]
PON	P59L	1.24	0.8	loop	[22]		TEM1	E240K	0.4	0.72	loop	[31]
PON	S166G	2.76	0.03	loop	[22]		TEM1	G238A	-0.3	0.34	loop	[31]
PON	T332S	0.49	0	sheet	[22]		TEM1	G238S	-0.48	0.34	loop	[31]
PON	Y190I	0.64	0.48	helix	[22]		TEM1	M69I	1.38	0.03	helix	[31]
New-function mutations
protein	mutation	DDG	ASA	DSSP	reference
TEM1	M69L	0.21	0.03	helix	[31]
TEM1	M69V	1.59	0.03	helix	[31]
TEM1	N276D	0.98	0.11	helix	[31]
TEM1	Q39K	0.26	0.72	helix	[31]
TEM1	R164C	2.91	0.14	loop	[31]
TEM1	R164H	4.03	0.14	loop	[31]
TEM1	R164S	4.9	0.14	loop	[31]
TEM1	R275L	0.65	0.11	helix	[31]
TEM1	R275Q	0.83	0.11	helix	[31]
VAO	A429V	-2.92	0	sheet	[29]
VAO	E502G	1.44	0.01	loop	[29]
VAO	I238T	2.94	0.01	loop	[29]
VAO	P454Y	-0.81	0.02	loop	[29]
VAO	T505S	-0.82	0.05	loop	[29]
Other mutations
protein	mutation	DDG	ASA	DSSP	reference		protein	mutation	DDG	ASA	DSSP	reference
Amylosucrase	D506N	0.51	0.47	loop	[1]		AspATs	A93T	0.26	0.53	helix	[4]
Amylosucrase	E62K	0.25	0.21	helix	[1]		AspATs	D169N	1.01	0.41	loop	[4]
Amylosucrase	N76D	-2.12	0.67	loop	[1]		AspATs	D325N	-0.36	0.57	helix	[4]
Amylosucrase	Q613H	0.94	0.63	loop	[1]		AspATs	D97N	-0.21	0.64	helix	[4]
AspATs	A253V	-1.51	0	sheet	[3]		AspATs	E214K	0.13	0.84	helix	[4]
AspATs	A269T	0.86	0	sheet	[3]		AspATs	E402K	-0.4	0.62	helix	[4]
AspATs	A290V	-0.51	0.1	helix	[3]		AspATs	E43G	1.88	0.56	loop	[4]
AspATs	A293V	-0.56	0.84	loop	[3]		AspATs	E7D	0.39	1	loop	[4]
AspATs	A381V	-2.74	0.05	loop	[3]		AspATs	F223S	3.31	0.01	sheet	[4]
AspATs	E234D	1.25	0.54	helix	[3]		AspATs	F362L	0.1	0.12	sheet	[4]
AspATs	E278K	-1.8	0.55	helix	[3]		AspATs	G151A	0.82	0.58	loop	[4]
AspATs	E7V	1.03	1	loop	[3]		AspATs	G216D	0.45	0.41	loop	[4]
AspATs	G197S	2.09	0	loop	[3]		AspATs	G31D	-0.23	0.76	loop	[4]
AspATs	G72S	-0.85	0.57	loop	[3]		AspATs	G364S	1.04	0.58	loop	[4]
AspATs	H143Y	0.21	0	sheet	[3]		AspATs	G72D	-0.85	0.56	loop	[4]
AspATs	K126G	1.05	0.57	loop	[3]		AspATs	G80S	0.11	0.13	helix	[4]
AspATs	K126R	-2.08	0.57	loop	[3]		AspATs	G89S	1.93	0.1	loop	[4]
AspATs	K41N	0.79	0.3	loop	[3]		AspATs	I309V	0.5	0	helix	[4]
AspATs	M326K	0.89	0.05	helix	[3]		AspATs	I318T	0.62	0.31	helix	[4]
AspATs	M397L	-0.13	0.02	helix	[3]		AspATs	I318V	0.58	0.31	helix	[4]
AspATs	N142I	0.07	0.43	loop	[3]		AspATs	I73T	1.1	0.15	loop	[4]
AspATs	N339D	-1.44	0.38	helix	[3]		AspATs	I76V	0.35	0.18	loop	[4]
AspATs	N388S	0.58	0.01	sheet	[3]		AspATs	K121E	1.53	0.79	helix	[4]
AspATs	Q226L	0.66	0.02	loop	[3]		AspATs	K126R	-2.08	0.66	loop	[4]
AspATs	R282C	2.08	0.56	helix	[3]		AspATs	K126S	1.15	0.66	loop	[4]
AspATs	R348C	-3.41	0.35	loop	[3]		AspATs	K98R	-1.05	0.43	loop	[4]
AspATs	S311G	0.47	0.6	helix	[3]		AspATs	N137D	1.34	0.56	loop	[4]
AspATs	T308A	1.14	0.17	helix	[3]		AspATs	N175S	1.47	0.79	helix	[4]
AspATs	A242T	-0.22	0.15	helix	[4]		AspATs	N178Y	1.84	0.53	helix	[4]
AspATs	R282C	1.64	0.62	helix	[4]		AspATs	N312D	-1.86	0.5	loop	[4]
AspATs	A14V	0.43	0.88	loop	[4]		AspATs	N339S	-0.17	0.44	helix	[4]
AspATs	A163V	0.46	0.61	loop	[4]		AspATs	N396D	0.39	0.21	helix	[4]
AspATs	A21V	-0.02	0.33	helix	[4]		AspATs	N63S	0.7	0.63	helix	[4]
AspATs	A242T	-0.33	0.15	helix	[4]		AspATs	N69S	0.05	0.8	loop	[4]
AspATs	A26V	0.6	0.74	loop	[4]		AspATs	N96D	0.89	0.76	helix	[4]
AspATs	A314T	0.34	0.57	helix	[4]		AspATs	N96S	-0.01	0.76	helix	[4]
AspATs	A317V	0.34	0.46	helix	[4]		AspATs	Q206R	0.98	0.49	loop	[4]
AspATs	A381V	-1.57	0.05	loop	[4]		AspATs	Q342R	-0.23	0.57	helix	[4]
AspATs	A398V	0.44	0.21	helix	[4]		AspATs	Q369H	-0.26	0.2	helix	[4]
Other mutations
protein	mutation	DDG	ASA	DSSP	reference		protein	mutation	DDG	ASA	DSSP	reference
AspATs	R332H	1.23	0.66	helix	[4]		DHFR	D116Y	0.34	0.59	loop	[2]
AspATs	R348H	-1.33	0.14	loop	[4]		DHFR	E154K	-1.09	0.23	sheet	[2]
AspATs	R81S	0.97	0.55	helix	[4]		DHFR	P129L	0.35	0.58	loop	[2]
AspATs	S277C	0.04	0.47	helix	[4]		DHFR	Q65R	-0.68	0.66	loop	[2]
AspATs	T167A	0.04	0.43	sheet	[4]		DHFR	S3R	3.58	0	sheet	[2]
AspATs	T340M	-0.41	0.14	helix	[4]		DHFR	W74C	2.69	0.2	sheet	[2]
AspATs	T44A	2.32	0.71	loop	[4]		DLH	173	1.79	0.39	loop	[6]
AspATs	T51A	0.72	0.59	helix	[4]		DLH	A134S	-0.14	0.09	helix	[6]
AspATs	V280A	1.84	0	helix	[4]		DLH	A229V	0.11	0.41	helix	[6]
AspATs	V379I	-0.6	0.03	sheet	[4]		DLH	G211D	-1.14	0.3	loop	[6]
AspATs	E154V	1.35	0.46	sheet	[4]		DLH	R45Q	1.06	0.48	helix	[6]
CAII	D110N	0.12	0.35	loop	[8]		DLH	R81A	2.53	0.34	helix	[6]
CCP	E93G	1.75	0.46	helix	[10]		DoxG	L182S	0.03	0.26	loop	[7]
CCP	G88S	-0.9	0	helix	[10]		DoxG	H59L	0.82	0.24	loop	[7]
CCP	H60R	-2.43	0.74	loop	[10]		DoxG	I265L	-0.74	0.02	sheet	[7]
CCP	N184Y	-0.93	0.33	helix	[10]		DoxG	K165R	0.93	0.46	helix	[7]
CCP	Q292L	2.47	0.32	helix	[10]		DoxG	K300I	2.51	0.82	loop	[7]
CCP	Y39H	-0.74	0.56	helix	[10]		DoxG	L253M	1.7	0.19	sheet	[7]
CCP	A194T	-0.18	0.32	loop	[11]		DoxG	D21E	-0.11	0.8	helix	[7]
CCP	A25V	-0.99	0.15	helix	[11]		DoxG	V290A	-0.94	0.34	loop	[7]
CCP	D148N	-0.03	0.57	loop	[11]		DoxG	Q101R	-3.01	0.78	helix	[7]
CCP	D279G	0.34	1	loop	[11]		DoxG	S191T	-0.57	0.02	sheet	[7]
CCP	E201G	4.67	0.13	helix	[11]		EstB	I245V	0.85	0.3	sheet	[9]
CCP	E35G	1.7	0.76	helix	[11]		EstB	R308C	0.03	0.59	loop	[9]
CCP	K226R	-0.9	0.79	loop	[11]		GlmS	A38T	-0.1	0.73	loop	[13]
CCP	M119V	1.74	0.07	helix	[11]		GlmS	D386V	-0.34	0.7	loop	[13]
CCP	N164D	-2.64	0.57	helix	[11]		GlmS	E14K	1.56	0.57	helix	[13]
CCP	N184D	0.66	0.33	helix	[11]		GlmS	E524G	0.24	0.86	loop	[13]
CCP	N87D	-0.63	0.43	helix	[11]		GlmS	I271T	1.74	0.16	sheet	[13]
CCP	P190L	2.29	0.19	loop	[11]		GlmS	I3T	0.35	0	sheet	[13]
CCP	P94A	2.44	0.42	helix	[11]		GlmS	R249C	0.48	0.71	loop	[13]
CCP	S246G	0.7	0.7	helix	[11]		hGST	L9P	0.9	0.18	loop	[14]
CCP	S282G	1.15	0.81	loop	[11]		hGST	C14S	1.68	0	helix	[14]
CCP	T288G	1.94	0.1	helix	[11]		hGST	K23M	1.24	0.38	helix	[14]
CCP	V154I	-0.84	0.03	helix	[11]		hGST	D25G	-0.38	0.98	loop	[14]
CCP	V5I	-0.76	0.63	loop	[11]		hGST	I26V	1.22	0.04	loop	[14]
CCP	V7I	-0.84	0.46	sheet	[11]		hGST	R31H	0.76	0.37	sheet	[14]
DHFR	A144T	0.38	0.62	loop	[2]		hGST	I36F	0.26	0.14	helix	[14]
DHFR	A84V	-0.04	0.25	helix	[2]		hGST	I36N	2.74	0.14	helix	[14]
Other mutations
protein	mutation	DDG	ASA	DSSP	reference		protein	mutation	DDG	ASA	DSSP	reference
hGST	Q47L	1.1	0.9	helix	[14]		Lipase	T226A	0.54	0.37	loop	[17]
hGST	V54A	0.8	0.11	loop	[14]		OmpT protease	D214V	0.52	0.45	loop	[19]
hGST	K58R	-0.2	0.37	sheet	[14]		OmpT protease	S17G	1.57	0.03	sheet	[19]
hGST	L89P	-1.19	0.33	helix	[14]		PHP	A87G	0.87	0.69	sheet	[24]
hGST	A91T	-0.2	0.11	helix	[14]		PHP	T183I	-0.02	0	loop	[24]
hGST	L111V	1.81	0.09	helix	[14]		PON	E249K	-0.78	0.53	sheet	[26]
hGST	A113V	0.56	0	helix	[14]		PON	F17Y	-0.73	0.79	loop	[26]
hGST	M119L	0.55	0	helix	[14]		PON	G339E	0.95	0.55	loop	[26]
hGST	Q131R	0.06	0.95	helix	[14]		PON	H31Y	1.04	0.9	loop	[26]
hGST	A138T	0.09	0.5	helix	[14]		PON	I109M	0.51	0.53	loop	[26]
hGST	V142A	-0.36	0.5	helix	[14]		PON	I343M	1.24	0	sheet	[26]
hGST	T143S	0.86	0.01	helix	[14]		PON	I65L	0.91	0.01	sheet	[26]
hGST	T143I	-0.83	0.01	helix	[14]		PON	K145R	-0.2	0.31	sheet	[26]
hGST	L147F	1.22	0	helix	[14]		PON	N105D	1.08	1	loop	[26]
hGST	T172A	2.82	0	helix	[14]		PON	S22P	-0.88	0.49	helix	[26]
hGST	M175L	-0.46	0.01	helix	[14]		PON	V213A	1.92	0.2	sheet	[26]
hGST	G179S	0.75	0.05	helix	[14]		PON	V30A	-0.6	0.17	loop	[26]
hGST	K190L	0.39	0.4	helix	[14]		PON	V97A	1.95	0.2	loop	[26]
hGST	A192T	-0.64	0.3	helix	[14]		PON	D122G	-0.24	0.21	sheet	[22]
hGST	T193A	3.1	0.52	helix	[14]		PON	D49G	0.13	0.68	loop	[22]
hGST	A210V	-0.21	0	helix	[14]		PON	E323G	5.71	0.09	sheet	[22]
hGST	V213A	0.74	0.23	helix	[14]		PON	F220L	0.83	0.01	sheet	[22]
hGST	K216R	0.46	0.53	helix	[14]		PON	F264L	2.16	0.12	loop	[22]
hGST	K218E	0.75	0.56	helix	[14]		PON	F98L	1.31	0.38	loop	[22]
hGST	P221S	1.4	0.73	loop	[14]		PON	I271T	2.81	0.03	sheet	[22]
hGST	P222L	1.02	0.67	loop	[14]		PON	K162E	-0.94	0.86	loop	[22]
hGST	P225L	2.08	0.69	helix	[14]		PON	K250R	-2.81	0.21	sheet	[22]
hGST	L236P	1.7	0.49	helix	[14]		PON	K297R	-1.68	0.84	loop	[22]
hGST	A237G	0.75	0.2	helix	[14]		PON	S272F	-3.76	0.15	sheet	[22]
hGST	I239F	0.66	0.05	helix	[14]		PON	S82P	0.09	0.49	loop	[22]
hGST	R240C	0.82	0.43	loop	[14]		PON	T103A	0.39	0.5	sheet	[22]
Lipase	A102V	-1.29	0	sheet	[17]		PON	T257A	0.68	0.43	sheet	[22]
Lipase	D113G	0.45	0.44	helix	[17]		PON	T35A	0.57	0.78	loop	[22]
Lipase	I142T	1.01	0.18	helix	[17]		PON	Y190H	-0.14	0.91	helix	[22]
Lipase	S112P	2.83	0.09	helix	[17]		PON	Y208N	3.03	0.14	sheet	[22]
Lipase	S147N	-0.21	0.65	helix	[17]		PON	Y352H	0.34	0.11	sheet	[22]
Lipase	S218L	-1.04	0.15	helix	[17]		PON	A296P	-1.48	0.73	loop	[30]
Lipase	S268N	-0.22	0.46	helix	[17]		PON	D123E	-0.21	1	loop	[30]
Lipase	T150A	-0.83	0.63	loop	[17]		PON	D354E	-0.53	1	sheet	[30]
Other mutations
protein	mutation	DDG	ASA	DSSP	reference		protein	mutation	DDG	ASA	DSSP	reference
PON	E101G	1.42	0.76	sheet	[30]		TEM1	D163G	0.93	0.31	loop	[31]
PON	E297K	-0.42	0.94	loop	[30]		TEM1	D35P	0.56	0.46	helix	[31]
PON	E94D	-0.03	0.77	loop	[30]		TEM1	G196D	-0.46	0.3	loop	[31]
PON	G136N	1.38	0.88	loop	[30]		TEM1	G196S	1.29	0.3	loop	[31]
PON	I103T	0.16	0.35	sheet	[30]		TEM1	G218E	-1.84	0.53	loop	[31]
PON	I121T	1.76	0.35	sheet	[30]		TEM1	G92D	-0.78	0.76	loop	[31]
PON	I187A	0.99	0.32	loop	[30]		TEM1	H153R	-5.19	0.56	helix	[31]
PON	I48V	1.7	0.01	loop	[30]		TEM1	H158N	-0.07	0.74	loop	[31]
PON	K93E	-0.7	0.95	loop	[30]		TEM1	H289L	-1.07	0.3	loop	[31]
PON	L311S	3.24	0.39	loop	[30]		TEM1	I127V	1.04	0	helix	[31]
PON	R19G	1.48	0.63	helix	[30]		TEM1	I173V	0.22	0.34	loop	[31]
PON	R260K	2.51	0.29	sheet	[30]		TEM1	K34E	1.13	0.53	helix	[31]
PON	S263D	-1.87	0.71	sheet	[30]		TEM1	L221K	1.31	0.04	helix	[31]
PON	S98L	-1.64	0.71	loop	[30]		TEM1	L51P	2.41	0.1	loop	[31]
PTE	A176V	-0.74	0.05	loop	[24]		TEM1	M182T	-0.32	0	loop	[31]
PTE	Q290R	-0.19	0.57	helix	[24]		TEM1	N175I	1.23	1	loop	[31]
PTE	T45A	0.96	0.23	sheet	[24]		TEM1	P145R	2.97	0.07	helix	[31]
PTE	V320A	1	0.31	helix	[24]		TEM1	R204Q	2.31	0.19	helix	[31]
PTE	V84A	1.21	0.17	helix	[24]		TEM1	S124N	-0.18	0.32	helix	[31]
PTE	H257Y	-1.42	0.03	loop	[25]		TEM1	S268G	3.79	0.05	loop	[31]
PTE	I274N	0.01	0.63	loop	[25]		TEM1	T114P	-0.63	0.91	loop	[31]
PTE	L87S	3.3	0	helix	[25]		TEM1	T265M	-2.5	0.05	sheet	[31]
PTE	Q148R	-2.67	0.68	helix	[25]		TEM1	V262I	-0.6	0	sheet	[31]
PTE	R67H	0.58	0.42	helix	[25]		TEM1	V80E	2.66	0.01	helix	[31]
DAOCS	A11V	0.65	0.29	helix	[27]		TEM1	V84I	-0.05	0.18	helix	[31]
DAOCS	A140V	-0.68	0.04	helix	[27]		TEM1	W165R	-0.79	0.37	loop	[31]
DAOCS	A198T	-0.11	0.89	loop	[27]		VAO	F93Y	-0.4	0.11	helix	[29]
DAOCS	D53H	-0.3	0.52	helix	[27]		VAO	P189S	2.66	0.3	loop	[29]
DAOCS	E144K	-0.25	0.82	loop	[27]		VAO	M437L	0.72	0.26	helix	[29]
DAOCS	I118V	0.23	0.08	helix	[27]
DAOCS	P145L	1.96	0.03	loop	[27]
DAOCS	R135Q	0.7	0	helix	[27]
DAOCS	R179Q	-1.09	0.4	loop	[27]
DAOCS	T259I	-0.57	0.05	sheet	[27]
TBPA	P256L	1.48	0.1	loop	[28]
TEM1	A184V	-0.72	0.2	helix	[31]
TEM1	A224K	-1.83	0.27	helix	[31]
TEM1	A280V	0.16	0.13	helix	[31]
TEM1	D157E	1.09	0.08	loop	[31]
Reference
1. van der Veen BA, Skov LK, Potocki-Veronese G, Gajhede M, Monsan P, et al. (2006) Increased amylosucrase activity and specificity, and identification of regions important for activity, specificity and stability through molecular evolution. Febs Journal 273: 673-681.
2. Watson M, Liu JW, Ollis D (2007) Directed evolution of trimethoprim resistance in Escherichia coli. Febs Journal 274: 2661-2671.
3. Yano T, Oue S, Kagamiyama H (1998) Directed evolution of an aspartate aminotransferase with new substrate specificities. Proc Natl Acad Sci U S A 95: 5511-5515.
4. Rothman SC, Kirsch JF (2003) How does an enzyme evolved in vitro compare to naturally occurring homologs possessing the targeted function? Tyrosine aminotransferase from aspartate aminotransferase. Journal of Molecular Biology 327: 593-608.
5. Oue S, Okamoto A, Yano T, Kagamiyama H (1999) Redesigning the substrate specificity of an enzyme by cumulative effects of the mutations of non-active site residues. J Biol Chem 274: 2344-2349.
6. Kim HK, Liu JW, Carr PD, Ollis DL (2005) Following directed evolution with crystallography: structural changes observed in changing the substrate specificity of dienelactone hydrolase. Acta Crystallographica Section D-Biological Crystallography 61: 920-931.
7. Fortin PD, MacPherson I, Neau DB, Bolin JT, Eltis LD (2005) Directed evolution of a ring-cleaving dioxygenase for polychlorinated biphenyl degradation. Journal of Biological Chemistry 280: 42307-42314.
8. Gould SM, Tawfik DS (2005) Directed evolution of the promiscuous esterase activity of carbonic anhydrase II. Biochemistry 44: 5444-5452.
9. Ivancic M, Valinger G, Gruber K, Schwab H (2007) Inverting enantio selectivity of Burkholderia gladioli esterase EstB by directed and designed evolution. Journal of Biotechnology 129: 109-122.
10. Iffland A, Gendreizig S, Tafelmeyer P, Johnsson K (2001) Changing the substrate specificity of cytochrome c peroxidase using directed evolution. Biochem Biophys Res Commun 286: 126-132.
11. Iffland A, Tafelmeyer P, Saudan C, Johnsson K (2000) Directed molecular evolution of cytochrome c peroxidase. Biochemistry 39: 10790-10798.
12. Reetz MT (2001) Combinatorial and Evolution-Based Methods in the Creation of Enantioselective Catalysts. Angew Chem Int Ed Engl 40: 284-310.
13. Deng MD, Grund AD, Wassink SL, Peng SS, Nielsen KL, et al. (2006) Directed evolution and characterization of Escherichia coli glucosamine synthase. Biochimie 88: 419-429.
14. Griswold KE, Aiyappan NS, Iverson BL, Georgiou G (2006) The evolution of catalytic efficiency and substrate promiscuity in human theta class 1-1 glutathione transferase. Journal of Molecular Biology 364: 400-410.
15. Griffiths JS, Cheriyan M, Corbell JB, Pocivavsek L, Fierke CA, et al. (2004) A bacterial selection for the directed evolution of pyruvate aldolases. Bioorganic & Medicinal Chemistry 12: 4067-4074.
16. Liebeton K, Zonta A, Schimossek K, Nardini M, Lang D, et al. (2000) Directed evolution of an enantioselective lipase. Chem Biol 7: 709-718.
17. Zha D, Wilensek S, Hermes M, Karl-Erich-Jaegerb, Reetz MT (2001) Complete reversal of enantioselectivity of an enzyme-catalyzed reaction by directed evolution. Chem Commun.
18. Fujii R, Nakagawa Y, Hiratake J, Sogabe A, Sakata K (2005) Directed evolution of Pseudomonas aeruginosa lipase for improved amide-hydrolyzing activity. Protein Eng Des Sel 18: 93-101.
19. Varadarajan N, Gam J, Olsen MJ, Georgiou G, Iverson BL (2005) Engineering of protease variants exhibiting high catalytic activity and exquisite substrate selectivity. Proceedings of the National Academy of Sciences of the United States of America 102: 6855-6860.
20. Yang H, Carr PD, McLoughlin SY, Liu JW, Horne I, et al. (2003) Evolution of an organophosphate-degrading enzyme: a comparison of natural and directed evolution. Protein Engineering 16: 135-145.
21. Reetz MT (2004) Changing the enantioselectivity of enzymes by directed evolution. Methods Enzymol 388: 238-256.
22. Aharoni A, Amitai G, Bernath K, Magdassi S, Tawfik DS (2005) High-throughput screening of enzyme libraries: thiolactonases evolved by fluorescence-activated sorting of single cells in emulsion compartments. Chem Biol 12: 1281-1289.
23. Wu ZL, Podust LM, Guengerich FP (2005) Expansion of substrate specificity of cytochrome P450 2A6 by random and site-directed mutagenesis. Journal of Biological Chemistry 280: 41090-41100.
24. Roodveldt C, Tawfik DS (2005) Shared promiscuous activities and evolutionary features in various members of the amidohydrolase superfamily. Biochemistry 44: 12728-12736.
25. Cho CMH, Mulchandani A, Chen W (2004) Altering the substrate specificity of organophosphorus hydrolase for enhanced hydrolysis of chlorpyrifos. Applied and Environmental Microbiology 70: 4681-4685.
26. Aharoni A, Gaidukov L, Khersonsky O, Mc QGS, Roodveldt C, et al. (2005) The 'evolvability' of promiscuous protein functions. Nat Genet 37: 73-76.
27. Wei CL, Yang YB, Deng CH, Liu WC, Hsu JS, et al. (2005) Directed evolution of Streptomyces clavuligerus deacetoxycephalosporin C synthase for enhancement of penicillin G expansion. Applied and Environmental Microbiology 71: 8873-8880.
28. Williams GJ, Domann S, Nelson A, Berry A (2003) Modifying the stereochemistry of an enzyme-catalyzed reaction by directed evolution. Proceedings of the National Academy of Sciences of the United States of America 100: 3143-3148.
29. van den Heuvel RHH, van den Berg WAM, Rovida S, van Berkel WJH (2004) Laboratory-evolved vanillyl-alcohol oxidase produces natural vanillin. Journal of Biological Chemistry 279: 33492-33500.
30. Aharoni A, Gaidukov L, Yagur S, Toker L, Silman I, et al. (2004) Directed evolution of mammalian paraoxonases PON1 and PON3 for bacterial expression and catalytic specialization. Proc Natl Acad Sci U S A 101: 482-487.
31. Jacoby, G. & Bush, K., Amino Acid Sequences for TEM, SHV and OXA Extended-Spectrum and Inhibitor Resistant ß-Lactamases. (http://www.lahey.org/studies/webt.asp)
